# Supplementary material
Source: HighWire-hosted journal article supplement (http://molpharm.aspetjournals.org/highwire/filestream/76786/field_highwire_adjunct_files/10/Supplementary_Table_S7.pdf)
Supplement: Supplementary_Table_S7.pdf [file Supplementary_Table_S7.pdf]

## Identification of Survival Genes in Human Glioblastoma Cells Using siRNA Screening

Nikhil G Thaker, Fang Zhang, Peter R. McDonald, Tong Ying Shun, Michael D Lewen, Ian F. Pollack, and John S. Lazo

### Molecular Pharmacology

Supplementary Table S7  
Inhibitor – Survival gene  
product list.

| <b>Gene<br/>Symbol</b> | <b>Accession</b> | <b>Drug or small molecule inhibitor</b>            |
|------------------------|------------------|----------------------------------------------------|
| AKT3                   | NM_181690        | enzastaurin                                        |
| ARHGEF11               | NM_014784        |                                                    |
| BST1                   | NM_004334        | AVAILABLE                                          |
| BUB1B                  | NM_001211        |                                                    |
| CHN1                   | NM_001025201     |                                                    |
| CLCN3                  | NM_173872        |                                                    |
| CYP1B1                 | NM_000104        |                                                    |
| DDX39                  | NM_138998        | Nogalamycin                                        |
| GALNS                  | NM_000512        |                                                    |
| GUSB                   | NM_000181        |                                                    |
| HLCS                   | NM_000411        |                                                    |
| IDH3B                  | NM_174856        |                                                    |
| ITGB3                  | NM_000212        | TP 9201, EMD121974, tirofiban                      |
| POLR2F                 | NM_021974        |                                                    |
| POLR2G                 | NM_002696        |                                                    |
| PSMA1                  | NM_148976        | BORTEZOMIB, MG132, proteasome inhibitors           |
| PSMA2                  | NM_002787        | BORTEZOMIB, MG132, proteasome inhibitors           |
| PSMA3                  | NM_152132        | BORTEZOMIB, MG132, proteasome inhibitors           |
| PSMA4                  | NM_002789        | BORTEZOMIB, MG132, proteasome inhibitors           |
| PSMA5                  | NM_002790        | BORTEZOMIB, MG132, proteasome inhibitors           |
| PSMA6                  | NM_002791        | BORTEZOMIB, MG132, proteasome inhibitors           |
| PSMB2                  | NM_002794        | BORTEZOMIB, MG132, proteasome inhibitors           |
| PSMB4                  | NM_002796        | BORTEZOMIB, MG132, proteasome inhibitors           |
| PSMC6                  | NM_002806        | BORTEZOMIB, MG132, proteasome inhibitors           |
| PSMD14                 | NM_005805        | BORTEZOMIB, MG132, proteasome inhibitors           |
| RAN                    | NM_006325        |                                                    |
| RRM1                   | NM_001033        | gemcitabine, clofarabine, fludarabine<br>phosphate |
| SMS                    | NM_004595        |                                                    |
| SPINK1                 | NM_003122        |                                                    |
| SPTLC1                 | NM_178324        |                                                    |
| TLR2                   | NM_003264        |                                                    |
| TNNI3K                 | NM_015978        |                                                    |
| UBL5                   | NM_024292        |                                                    |

## Identification of Survival Genes in Human Glioblastoma Cells Using siRNA Screening

Nikhil G Thaker, Fang Zhang, Peter R. McDonald, Tong Ying Shun, Michael D Lewen, Ian F. Pollack, and John S. Lazo

Molecular Pharmacology
